# Supplementary material for: Mutation of wbtJ, a N-formyltransferase involved in O-antigen synthesis, results in biofilm formation, phase variation and attenuation in Francisella tularensis
Source: PubMed Central journal article supplement (PMC10924466; doi:10.1099/mic.0.001437), 2024-02-29
Supplement: mic-170-1437-s002.pdf [file mic-170-1437-s002.pdf]

1           **Mutation of *wbtJ*, a *N*-formyltransferase involved in O-antigen synthesis,**  
2           **results in biofilm formation, phase variation, and attenuation in *Francisella***  
3                                           ***tularensis*.**

4  
5  
6  
7  
8   Kevin D. Mlynek<sup>1#</sup>, Ron G. Toothman<sup>1</sup>, Elsie E. Martinez<sup>1</sup>, Ju Qiu<sup>2</sup>, Joshua B. Richardson<sup>3</sup>, Joel A. Bozue<sup>1#</sup>

9   <sup>1</sup>Bacteriology Division, <sup>2</sup>Regulated Research Administration Division, <sup>3</sup>Center for Genome Sciences, U.S.  
10   Army Medical Research Institute of Infectious Diseases (USAMRIID), Frederick, MD, USA

11  
12   <sup>#</sup>co-corresponding authors: kevin.d.mlynek.civ@health.mil, joel.a.bozue.civ@health.mil

13  
14  
15  
16  
17   **SUPPLEMENTARY MATERIALS**

18

19

20 **Materials and Methods**

21

22 Table S1: Primers used in this study.

| Primer Name     | Sequence                                   | Purpose                                                  |
|-----------------|--------------------------------------------|----------------------------------------------------------|
| oKM189          | cccGATCCATTAATGATGATAGTCTTG                | <i>wbtJ</i> (FTL_0602) proximal F for deletion (bamHI)   |
| oKM192          | ggttGATATCGTAGTGTCGTTTGTATGATAC            | <i>wbtJ</i> (FTL_0602) distal R for deletion (ecoRV)     |
| oRGT_wbtJ_SOE1R | cccgggcccgggcccCATGAGGAAACCTCTTTGATATTATTA | deletion of <i>wbtJ</i> upstream flank use with oKM189   |
| oRGT_wbtJ_SOE2F | gggcccggggcccgggTAGAAAAATGAGCCTTAAAAAATAC  | deletion of <i>wbtJ</i> downstream flank use with oKM192 |
| oKM193          | cccGATCCCGATAAAATTAATAAAATAATT             | <i>wbtJ</i> (FTL_0602) Forward complementation (ecoRV)   |
| oRGT_wbtJ_seq F | gagccaaagcagtatatgccaa                     | Sanger sequencing of <i>wbtJ</i> region                  |
| oRGT_wbtJ_seq R | caatcagaccaaatgcatcatgac                   | Sanger sequencing of <i>wbtJ</i> region                  |

23

24

25 Table S2: Plasmids used in this study.

| Plasmid Name | Description                                        | Source               |
|--------------|----------------------------------------------------|----------------------|
| pEDL50       | suicide vector for allelic exchange                | Lovullo et al., 2012 |
| pKM41        | pEDL50 containing <i>wbtJ</i> deletion fragment    | This study           |
| pMP814       | empty vector with <i>blaB</i> promoter             | Lovullo et al., 2009 |
| pKM43        | pMP814 containing a functional copy of <i>wbtJ</i> | This study           |

26

27

28 **Generation of growth curves.** *F. tularensis* strains were resuspended in PBS (phosphate buffered saline,  
 29 pH 7.2) to an OD<sub>600</sub> of 0.3. Bacterial suspensions were diluted 1 to 10 into or Chamberlain's Defined  
 30 Medium (CDM)<sup>1</sup> in a 96-well plate. Growth was then assayed by OD<sub>600</sub> reading every 30 min using a Tecan  
 31 M200 Pro (Tecan Systems, San Jose, CA) microplate reader at 37°C with orbital shaking. Absorbance values  
 32 were determined using the average of triplicate wells and subtracting the medium background as  
 33 determined by the sterility control.

34

35

36

37

38

39

40 **Results**

41

42

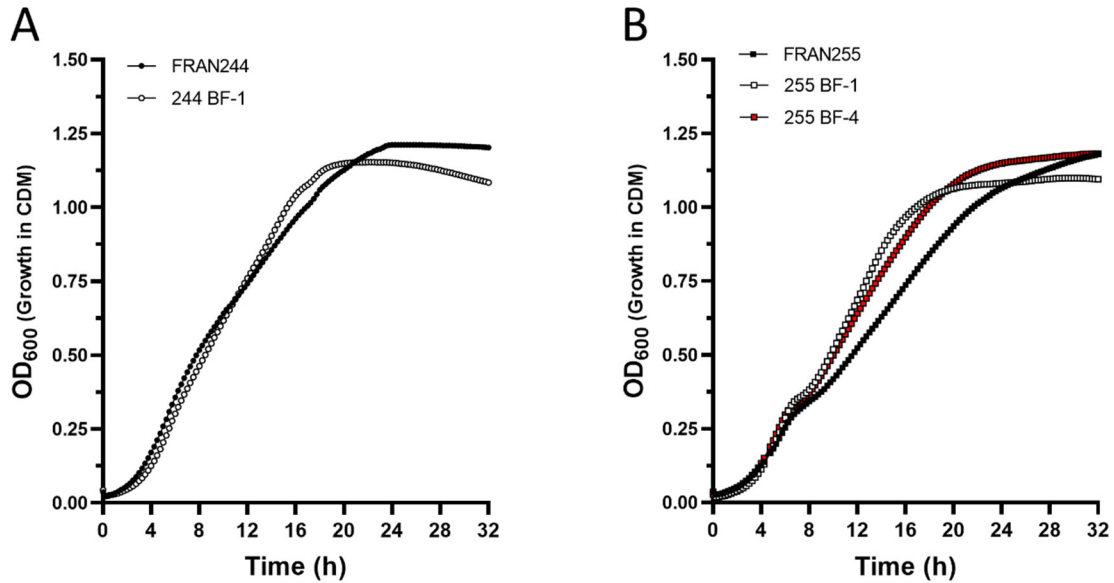

43

44 **Figure S1: Growth curve analysis of biofilm forming variants compared to the parental isolate. (A)**

45 FRAN244 or **(B)** FRAN255 variant isolates were cultured in CDM at 37°C shaking over the course of 32 h

46 using the OD<sub>600</sub> to monitor growth. Data are the average of 2 independent experiments based upon 3

47 technical replicates per assay.

48

49

50

51

Mutation of *wbtJ* in *F. tularensis*: Supplementary Materials

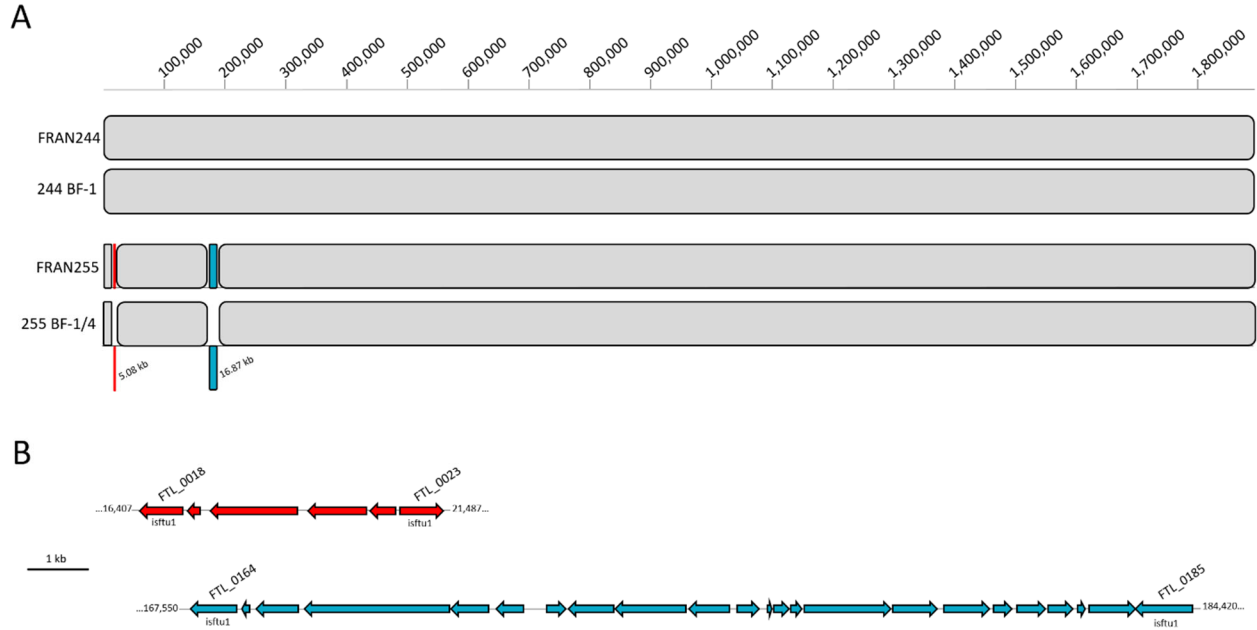

52 LVS genome co-ordinates displayed for ease of comparison (NC\_007880)

53

54 **Figure S2: Genome alignment of biofilm forming variants.** Illumina and Nanopore reads were used to  
 55 generate *de novo* assemblies via Unicycler. Mauve was used for whole genome alignments compared to  
 56 the respective parental strain. Two identical inversions were identified in 255 BF-1 and 255BF-4 bounded  
 57 by repetitive mobile elements (*isftu1*) spanning 5080 bp (red invert) and 16, 870 bp (blue invert). For  
 58 comparison purposes, LVS genome co-ordinates are shown.

59

60 **Table S3:** SNPs identified in LVS gray variants that do not form biofilm as a control comparison.

| STRAIN          | PHENOTYPE     | POSITION | REF | ALT | STRAND | NT POS   | AA POS  | EFFECT     | MUTATION  | LOCUS TAG | KEGG      | SchuS4<br>HOMOLOG | GENE         | DESCRIPTION                                                          |
|-----------------|---------------|----------|-----|-----|--------|----------|---------|------------|-----------|-----------|-----------|-------------------|--------------|----------------------------------------------------------------------|
| LVS Isolate #15 | GV, biofilm + | 108388   | C   | T   |        |          |         | intergenic |           | AW21_128  | FTL_1339  | FTT_0572          |              | potential promotor alteration<br>formyl transferase<br>encodes 5sRNA |
|                 |               | 1315079  | C   | T   | -      | 457/726  | 153/241 | nonsense   | Gln153*   | AW21_1477 | FTL_0602  | FTT_1454c         | <i>wbtJ</i>  |                                                                      |
|                 |               | 1848663  | G   | A   |        | 14/115   |         | unknown    |           | AW21_2092 | FTL_R0032 |                   | <i>rfj</i>   |                                                                      |
| LVS Isolate #11 | GV, biofilm - | 1303079  | G   | T   | -      | 292/1737 | 98/579  | Nonsense   | Glu98*    | AW21_1467 | FTL_0592  | FTT_1464c         | <i>wbtA1</i> | polysaccharide biosynthesis protein                                  |
| LVS Isolate #13 | GV, biofilm - | 960093   | T   | G   | +      | 458/624  | 153/208 | missense   | Val153Gly | AW21_1081 | FTL_0237  | FTT_0326          | <i>rplD</i>  | 50s ribosomal protein L4                                             |
|                 |               | 1309532  | T   | G   | -      | 194/1230 | 65/410  | missense   | Phe65Cys  | AW21_1473 | FTL_0598  | FTT_1458c         | <i>wzy</i>   | Membrane protein/O-antigen protein                                   |
|                 |               | 1636790  | C   | A   | +      | 423/633  | 141/211 | synonymous | Ala       | AW21_1838 | FTL_0942  | FTT_0668          |              | nicotinamide mononucleotide transporter pmuC                         |
| LVS Isolate #14 | GV, biofilm - | 452704   | G   | T   | -      | 348/474  | 116/158 | synonymous | Gln       | AW21_509  | FTL_1693  | FTT_1625c         |              | putative pilus assembly protein                                      |
|                 |               | 1419600  | T   | C   | +      | 449/1272 | 150/424 | missense   | Phe150Cys | AW21_1590 | FTL_0705  | FTT_1239          |              | putative membrane protein                                            |
|                 |               | 1420302  | C   | T   | -      | 47/1332  | 16/444  | missense   | Ala16Val  | AW21_1591 | FTL_0706  | FTT_1238c         | <i>waxL</i>  | o-antigen ligase like membrane family protein                        |

61

62

63

64

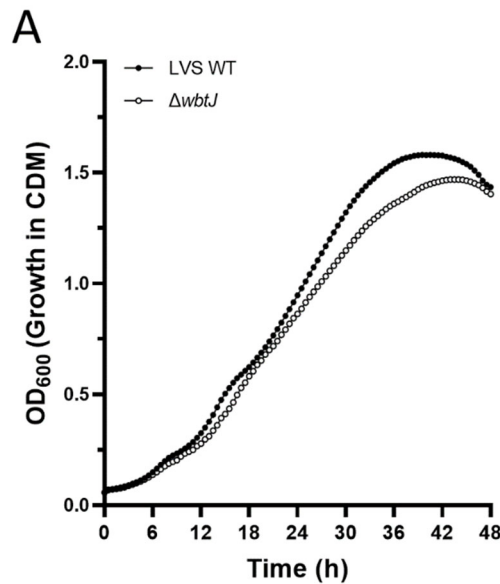

65

66

67 **Figure S3:** Growth curve analysis of an in-frame  $\Delta wbtJ$  deletion mutant compared to the parental

68 isolate. LVS wild-type (parent, black circles) or an isogenic  $\Delta wbtJ$  mutant (open circles) was cultured in

69 CDM at 37°C shaking over the course of 48 h using the OD<sub>600</sub> to monitor growth. Data are the average of

70 3 independent experiments based upon at least 3 technical replicates per assay.

71

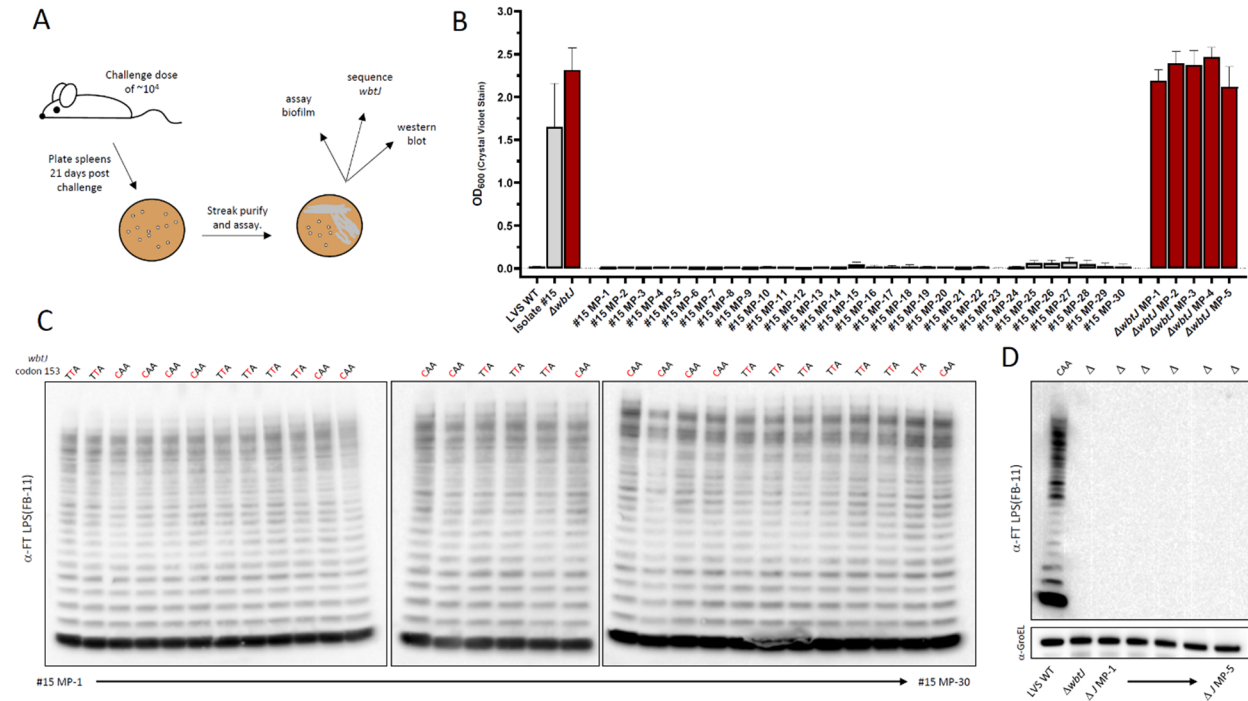

72

73 **Figure S4: Phenotypic assessment of colonies recovered from mouse spleen at 21 days post challenge**

74 **for Isolate #15 and a  $\Delta wbtJ$  mutant. (A)** A schematic illustrating how samples were recovered and analyzed

75 at the end of study for Isolate #15 and a  $\Delta wbtJ$  mutant to determine the *wbtJ* allele, biofilm forming

76 capacity, and O-Ag status. **(B)** Biofilm formation of purified representative isolates recovered from mice

77 spleens after challenge. Crystal violet staining was performed at two days post inoculation after static

78 incubation at 37°C. Western analysis with  $\alpha$ -LPS (FB-11) on mouse passaged samples from **(C)** isolate #15

79 and **(D)**  $\Delta wbtJ$  mutant. The sequence at the codon mutated in *wbtJ* is indicated above each lane. In the

80 case of  $\Delta wbtJ$  isolates,  $\alpha$ -GroEL was used as a loading control and *wbtJ* was confirmed to be absent by

81 sequencing. These data support the summary data provided in Table 6.

82

83

84 **References**

85 1. Chamberlain, R.E. Evaluation of Live Tularemia Vaccine Prepared in a Chemically Defined  
86 Medium. *Appl Microbiol* 13, 232-235 (1965).
